# Supplementary material for: High Thermal Stability and Color Purity of Y2SrAl4SiO12: Eu3+ Garnet-Variant-Structured Phosphor for Warm White Light LED-Lamp
Source: MDPI journal article supplement (doi:10.3390/cryst12101382), 2022-09-29
Supplement: s1 [file s1]

# High Thermal Stability and Color Purity of $\text{Y}_2\text{SrAl}_4\text{SiO}_{12}:\text{Eu}^{3+}$ Garnet-Varia nt-Structured Phosphor for Warm White Light LED-Lamp

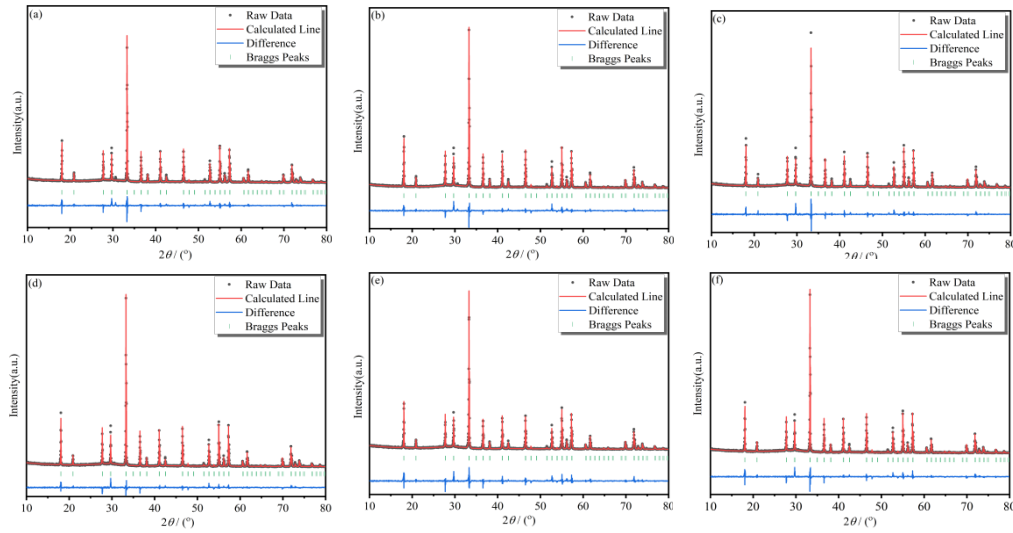

Figure S1. (a–f) are the refined structures of  $\text{YSAS}: x\text{Eu}^{3+}$  ( $x = 0.05\text{--}0.35$ ) phosphors, respectively.

Table S1 Refinement results of  $\text{YSAS}: x\text{Eu}^{3+}$  ( $x = 0.05\text{--}0.35$ ) phosphors.

| Formula                             | YSAS:<br>$0.05\text{Eu}^{3+}$          | YSAS:<br>$0.1\text{Eu}^{3+}$           | YSAS:<br>$0.15\text{Eu}^{3+}$          |
|-------------------------------------|----------------------------------------|----------------------------------------|----------------------------------------|
| Space group                         | <i>Ia3d</i>                            | <i>Ia3d</i>                            | <i>Ia3d</i>                            |
| Volume ( $\text{\AA}^3$ )           | 1742.467                               | 1742.545                               | 1742.611                               |
| Lattice parameters ( $\text{\AA}$ ) | a=12.03479<br>b=12.03479<br>c=12.03479 | a=12.03497<br>b=12.03497<br>c=12.03497 | a=12.03514<br>b=12.03514<br>c=12.03514 |
| $R_{\text{wp}}(\%)$                 | 9.02                                   | 8.12                                   | 8.61                                   |
| $R_{\text{p}}(\%)$                  | 9.36                                   | 9.42                                   | 8.19                                   |
| $\chi^2(\%)$                        | 3.29                                   | 3.01                                   | 2.77                                   |

| Formula                      | YSAS:<br>0.2Eu <sup>3+</sup>           | YSAS:<br>0.25Eu <sup>3+</sup>          | YSAS:<br>0.35Eu <sup>3+</sup>          |
|------------------------------|----------------------------------------|----------------------------------------|----------------------------------------|
| Space<br>group               | <i>Ia3d</i>                            | <i>Ia3d</i>                            | <i>Ia3d</i>                            |
| Volume<br>(Å <sup>3</sup> )  | 1742.759                               | 1742.898                               | 1742.992                               |
| Lattice<br>parameters<br>(Å) | a=12.03546<br>b=12.03546<br>c=12.03546 | a=12.03556<br>b=12.03556<br>c=12.03556 | a=12.03579<br>b=12.03579<br>c=12.03579 |
| R <sub>wp</sub> (%)          | 9.17                                   | 9.52                                   | 8.54                                   |
| R <sub>p</sub> (%)           | 8.11                                   | 7.85                                   | 7.86                                   |
| χ <sup>2</sup> (%)           | 2.35                                   | 4.63                                   | 2.24                                   |
